# Supplementary material
Source: PubMed Central journal article supplement (PMC4213209)

# AHA Journals

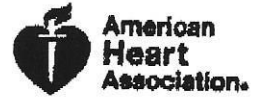

Home • Subscriptions • Feedback • Help • Circulation Journals Home • AHA Journals Home

Institution: Houston Academy of Medicine

Search:

## Acknowledgment Permission Form

Journal Stroke

Manuscript No. STROKE/2014/006395

First author Feng, Kimberly L.

Title of work Cover Title:

Capacity in Stroke

to DR A. BARRETO  
FAX 713 500 0780

from E. Etchells  
416 480 5996

### Acknowledgment Permission:

Authors must provide written permission/approval from all individuals mentioned by name in the Acknowledgements section of a submitted manuscript. By signing this form, any and all acknowledged persons therefore state that they have read and approved the mention of their names in the Acknowledgment section of the aforementioned paper.

Printed Name Ed Etchells MD, MSc

Signature 

Date JULY 30 2014 

Printed Name

Signature

Date

Printed Name

Signature

Date

Printed Name

Signature

Date

In addition, to above I agree that my name and complete contact information appear in the manuscript data supplement as below:

Ed Etchells MD, M.Sc.  
Associate Scientist  
Sunnybrook Health Sciences Centre  
2075 Bayview Ave., Room H469  
Toronto, ON  
M4N 3M5  
Phone: 416-480-5996  
Fax: 416-480-6777  
Email: edward.etchells@sunnybrook.ca

Signature: 

Date: JULY 30/2014 

Supplement: NIHMS626443-supplement-Related_Manuscript_File.pdf [file NIHMS626443-supplement-Related_Manuscript_File.pdf]
